# Supplementary material for: Salt-Templated Nanoarchitectonics of CoSe2-NC Nanosheets as an Efficient Bifunctional Oxygen Electrocatalyst for Water Splitting
Source: MDPI journal article supplement (doi:10.3390/ijms23095239), 2022-05-07
Supplement: s1 [file s1]

## Supplementary Information

### **Salt-templated nanoarchitectonics of CoSe<sub>2</sub>-NC nanosheets as an efficient bifunctional oxygen electrocatalyst for water split-ting**

Hong Cao <sup>a</sup>, Hailong Li <sup>a\*</sup>, Linhao Liu <sup>a,b</sup>, Kangning Xue <sup>a</sup>, Xinkai Niu <sup>a</sup>, Juan Hou <sup>a\*</sup>,  
Long Chen <sup>b</sup>

<sup>a</sup> College of Science/Key Laboratory of Ecophysics and Department of Physics, Shihezi University,  
Shihezi 832003, Xinjiang, China.

<sup>b</sup> School of Chemistry and Chemical Engineering/Key Laboratory for Green Process of Chemical  
Engineering of Xinjiang Bingtuan, Shihezi University, Shihezi 832003, Xinjiang, China.

\*Corresponding Author.

Email address: well09131015@126.com

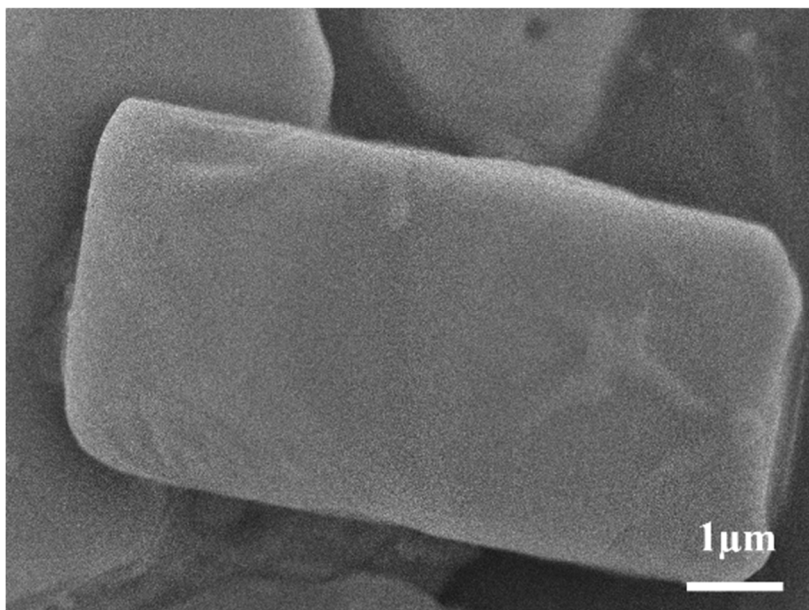

Figure S1: SEM image of the NaCl@MOF.

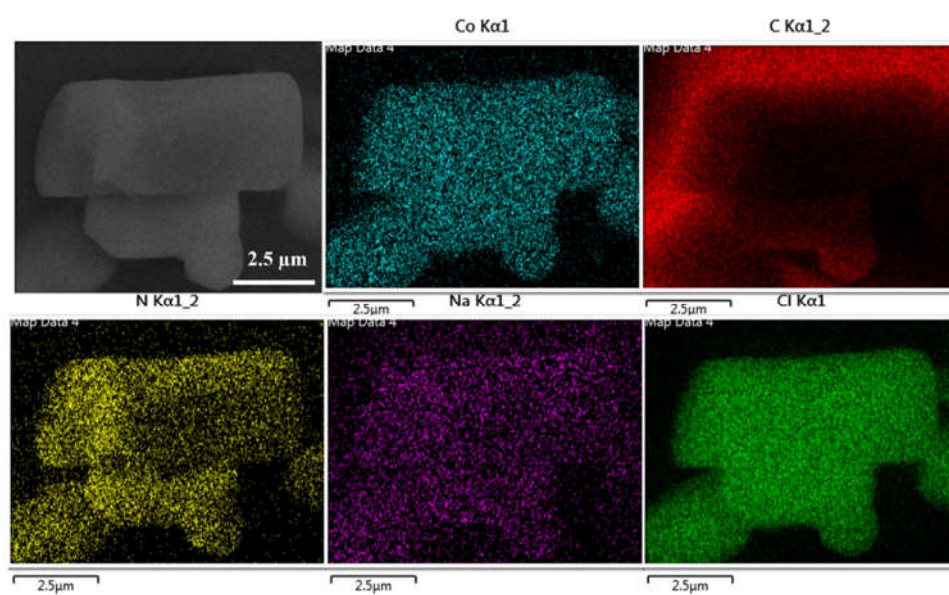

Figure S2: EDS elemental mapping images of NaCl@MOF.

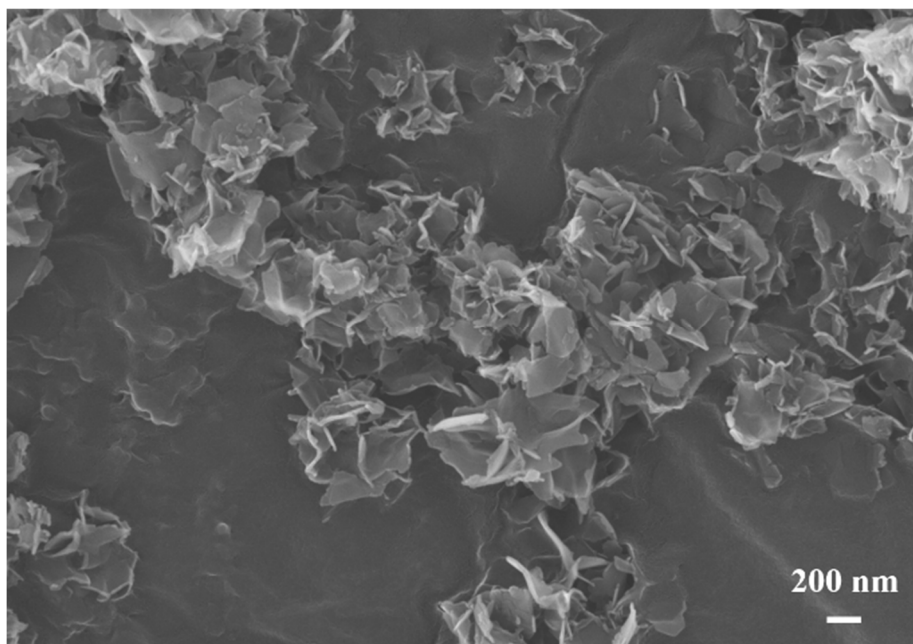

Figure S3: SEM image of the 2D MOF with removed salt-template.

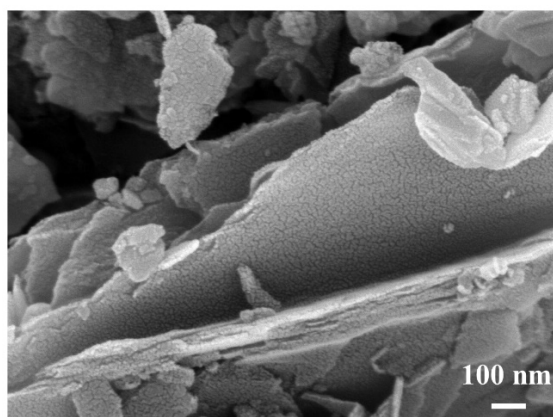

Figure S4: SEM image of CoSe<sub>2</sub>-NC NSs.

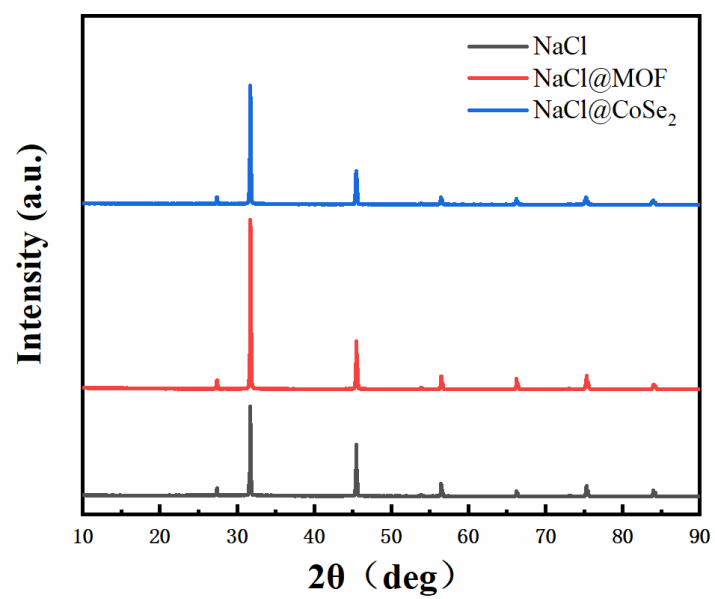

Figure S5: XRD pattern of NaCl crystal, NaCl@MOF, and NaCl@CoSe<sub>2</sub>.

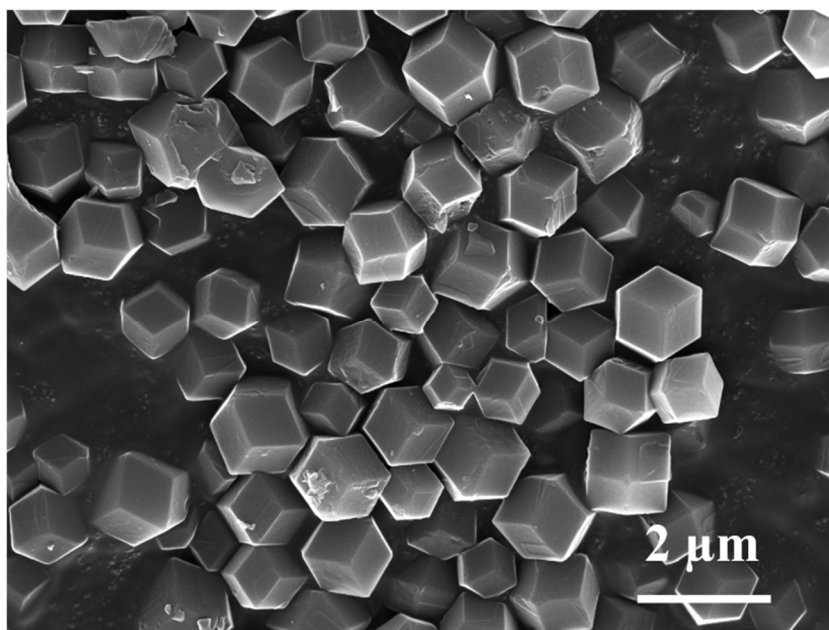

Figure S6: SEM image of the ZIF-67.

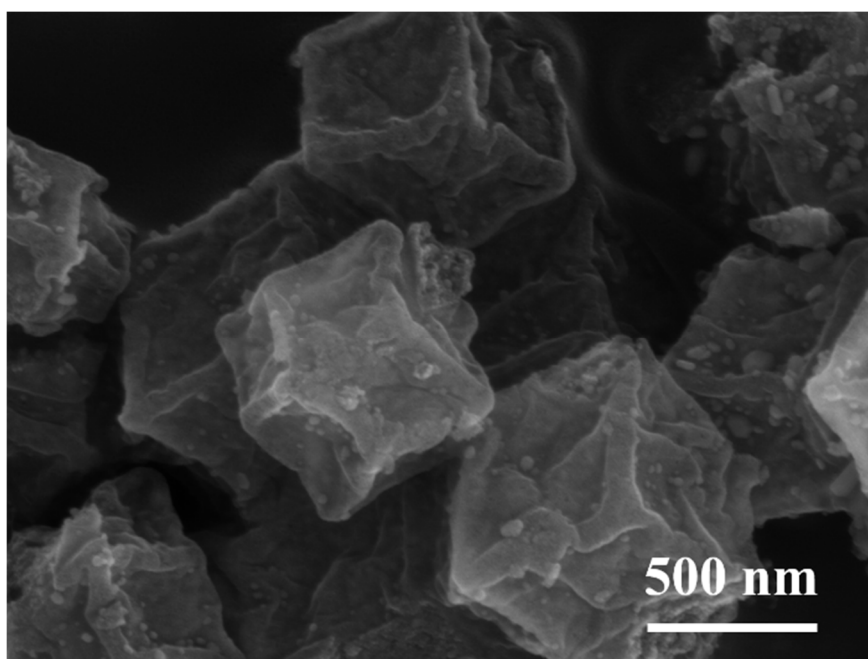

Figure S7: SEM image of the CoSe<sub>2</sub>-NC NPs.

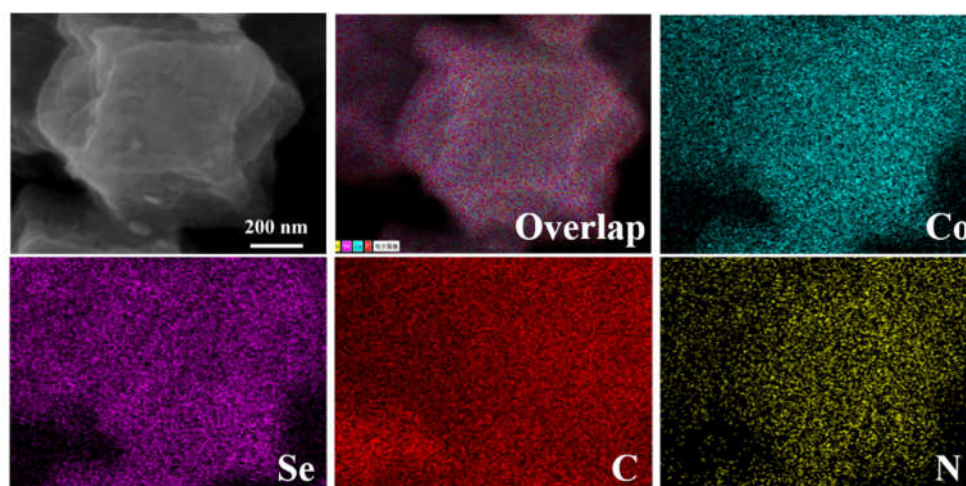

Figure S8: EDS elemental mapping images of CoSe<sub>2</sub>-NC NPs.

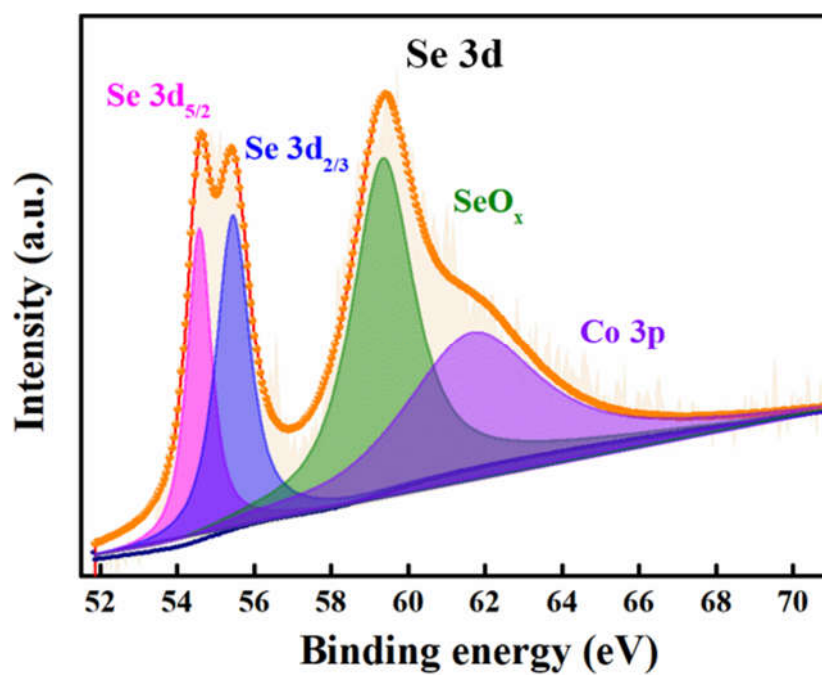

Figure S9: High-resolution XPS spectra of Se 3d for the CoSe<sub>2</sub>-NC NSs.

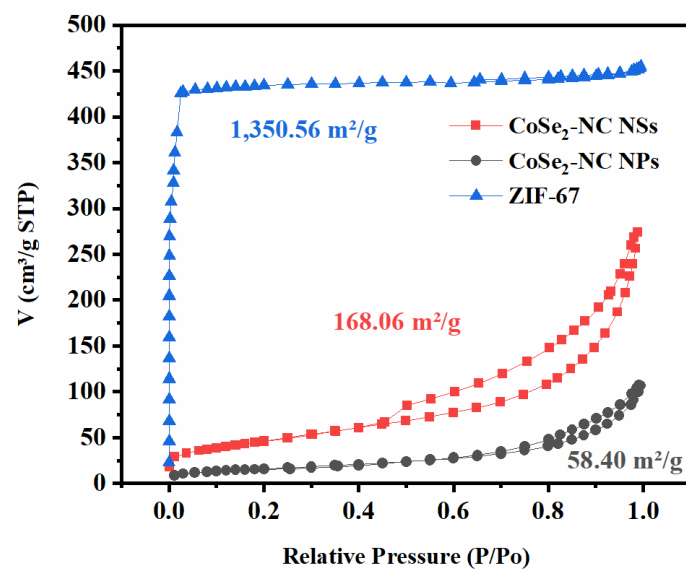

Figure S10: BET surface area of CoSe<sub>2</sub>-NC NSs, CoSe<sub>2</sub>-NC NPs and ZIF-67.
